# Supplementary material for: Scalable In Situ Hybridization on Tissue Arrays for Validation of Novel Cancer and Tissue-Specific Biomarkers
Source: PLoS One. 2012 Mar 8;7(3):e32927. doi: 10.1371/journal.pone.0032927 (PMC3297615; doi:10.1371/journal.pone.0032927)
Supplement: Table S1 — PCR primer sequences used for RNA probe generation. (XLS) [file pone.0032927.s006.xls]

## Sheet: Blad1
Supplementary Table S1. PCR primer sequences used for RNA probe generation
Gene	PCR primer	Forward sequence 5' to 3'	Reverse sequence 5' to 3'
BRD1	BRD1 T7_F1+R1	T7_ACCAGCTGCAAGACAAGGAC	GTTTCGGAGAAGGGCAATTT
	BRD1 F1+T7_R1	ACCAGCTGCAAGACAAGGAC	T7_GTTTCGGAGAAGGGCAATTT
	BRD1 T7_F2+R2	T7_CTTCTGCAGCCAAGGAAAAG	GACTTGGTCTGCATGTGCTC
	BRD1 F2+T7_R2	CTTCTGCAGCCAAGGAAAAG	T7_GACTTGGTCTGCATGTGCTC
CHGA	CHGA T7_F1+R1	T7_TTGAGGTCATCTCCGACACA	CACTCAGGCCCTTCTCTCTG
	CHGA F1+T7_R1	TTGAGGTCATCTCCGACACA	T7_CACTCAGGCCCTTCTCTCTG
	CHGA T7_F2+R2	T7_CACAGCGGTTTTGAAGATGA	TTTCCGGATCTCCTTGTAGC
	CHGA F2+T7_R2	CACAGCGGTTTTGAAGATGA	T7_TTTCCGGATCTCCTTGTAGC
EZH2	EZH2 T7_F1+R1	T7_GAGTGTTCGGTGACCAGTGA	ATGTTGGGGGTACATTCAGG
	EZH2 F1+T7_R1	GAGTGTTCGGTGACCAGTGA	T7_ATGTTGGGGGTACATTCAGG
	EZH2 T7_F2+R2	T7_CGCTTTTCTGTAGGCGATGT	TGGTCCCAATTAACCTAGCAA
	EZH2 F2+T7_R2	CGCTTTTCTGTAGGCGATGT	T7_TGGTCCCAATTAACCTAGCAA
FAM174B	FAM174 T7_F+R	T7_AGCTCCAGCTCCAACAGCA	ATTTAGTGGCGCCATTTCC
	FAM174 F+T7_R	AGCTCCAGCTCCAACAGCA	T7_ATTTAGTGGCGCCATTTCC
GAD1	GAD1 T7_F+R	T7_CCAACAGCCTGGAAGAGAAG	GAGGACAAACACTGGTGCAA
	GAD1 F+T7_R	CCAACAGCCTGGAAGAGAAG	T7_GAGGACAAACACTGGTGCAA
JAK3	JAK3 T7_F1+R1	T7_AGGACCTGTCCTGCTGGTT	CGCTCCAGGTCCATGATGT
	JAK3 F1+T7_R1	AGGACCTGTCCTGCTGGTT	T7_CGCTCCAGGTCCATGATGT
	JAK3 T7_F2+R2	T7_CTGGAGTGGCATGAGAACCT	GATCCTGTCGGTGAGCATCT
	JAK3 F2+T7_R2	CTGGAGTGGCATGAGAACCT	T7_GATCCTGTCGGTGAGCATCT
JUP	JUP T7_F1+R1	T7_AGCCAAGGTGACCTGGAGTA	TCCTGGTACAGGAGCAGGTT
	JUP F1+T7_R1	AGCCAAGGTGACCTGGAGTA	T7_TCCTGGTACAGGAGCAGGTT
	JUP T7_F2+R2	T7_AAGGTGCTATCCGTGTGTCC	GATTCCTGATCAAGCCGATG
	JUP F2+T7_R2	AAGGTGCTATCCGTGTGTCC	T7_GATTCCTGATCAAGCCGATG
KRT17	KRT17 T7_F+R	T7_GCTGGCCTACCTGAAGAAGA	TAGGTGGCAATCTCCTGCTC
	KRT17 F+T7_R	GCTGGCCTACCTGAAGAAGA	T7_TAGGTGGCAATCTCCTGCTC
LYN	LYN T7_F+R	T7_TCCTGAAGAGCGATGAAGGT	AATCATCCAGGACGCTCTGT
	LYN F+T7_R	TCCTGAAGAGCGATGAAGGT	T7_AATCATCCAGGACGCTCTGT
MIXL1	MIXL1 T7_F+R	T7_AAGCGCACGTCTTTCAGC	CTCCCATGAGTCCAGCTTTG
	MIXL1 F+T7_R	AAGCGCACGTCTTTCAGC	T7_CTCCCATGAGTCCAGCTTTG
MKI67	MKI67 T7_F+R	T7_TGCTCTGGGTTACCTGGTCT	TCCGAAGCACCACTTCTTCT
	MKI67 F+T7_R	TGCTCTGGGTTACCTGGTCT	T7_TCCGAAGCACCACTTCTTCT
PDE6A	PDE6A T7_F+R	T7_GACCTCGCCCTGTATTTCAA	TGCAGCAGGACTTGGATGTA
	PDE6A F+T7_R	GACCTCGCCCTGTATTTCAA	T7_TGCAGCAGGACTTGGATGTA
PECAM1	PECAM1 T7_F1+R1	T7_CCCAGCCCAGGATTTCTTAT	TCTGTTGAAGGCTGTGCAGT
	PECAM1 F1+T7_R1	CCCAGCCCAGGATTTCTTAT	T7_TCTGTTGAAGGCTGTGCAGT
	PECAM1 T7_F2+R2	T7_GAGAGGACATTGTGCTGCAA	CCGTGTACTGCACGTCTGAG
	PECAM1 F2+T7_R2	GAGAGGACATTGTGCTGCAA	T7_CCGTGTACTGCACGTCTGAG
PTPRC	PTPRC T7_F1+R1	T7_GTGAAGCTGCACATCAAGGA	TCAGAAATGCCAGAAATGCT
	PTPRC F1+T7_R1	GTGAAGCTGCACATCAAGGA	T7_TCAGAAATGCCAGAAATGCT
	PTPRC T7_F2+R2	T7_AAGAATTGCGATTTCCGTGT	CCCTGCATCTCCGTTTATCT
	PTPRC F2+T7_R2	AAGAATTGCGATTTCCGTGT	T7_CCCTGCATCTCCGTTTATCT
SATB2	SATB2 T7_F1+R1	T7_CGTGGGAGGTTTGATGATTC	AAACTCCTGGCACTTGGTTG
	SATB2 F1+T7_R1	CGTGGGAGGTTTGATGATTC	T7_AAACTCCTGGCACTTGGTTG
	SATB2 T7_F2+R2	T7_TTAGCCAGCTGGTGGAGACT	CTGTGGTGAATTTGGCTGTG
	SATB2 F2+T7_R2	TTAGCCAGCTGGTGGAGACT	T7_CTGTGGTGAATTTGGCTGTG
VIL1	VIL1 T7_F1+R1	T7_GAAGCACGTGGAGACCAACT	CTTTCTTCCCTTTCCACACG
	VIL1 F1+T7_R1	GAAGCACGTGGAGACCAACT	T7_CTTTCTTCCCTTTCCACACG
	VIL1 T7_F2+R2	T7_GCACCTCCCGAACTAACAAC	GCCTTCTTCTCCTCCTCGTT
	VIL1 F2+T7_R2	GCACCTCCCGAACTAACAAC	T7_GCCTTCTTCTCCTCCTCGTT
ZNF473	ZNF473 T7_F+R	T7_GAACAGGGGGACACGTTCT	GCTGTGGTCGGAGTAGGAGA
	ZNF473 F+T7_R	GAACAGGGGGACACGTTCT	T7_GCTGTGGTCGGAGTAGGAGA
T7: T7 promoter sequence 5'-GCGTAATACGACTCACTATAGGG-3', F: forward, R: reverse
