# Supplementary material for: Scalable In Situ Hybridization on Tissue Arrays for Validation of Novel Cancer and Tissue-Specific Biomarkers
Source: PLoS One. 2012 Mar 8;7(3):e32927. doi: 10.1371/journal.pone.0032927 (PMC3297615; doi:10.1371/journal.pone.0032927)
Supplement: Table S2 — Primary antibodies used for immunohistochemistry. (XLS) [file pone.0032927.s007.xls]

## Sheet: Blad1
Supplementary Table S2. Primary antibodies used for immunohistochemistry
Gene	Antibody ID	Distributor	Dilution
BRD1	HPA001063	Atlas Antibodies	1:100
CHGA	HPA017369	Atlas Antibodies	1:600
EZH2	CAB009589	Novocastra	1:100
FAM174B	HPA015306	Atlas Antibodies	1:150
GAD1	CAB004415	Santa Cruz Biotechnology	1:300
JAK3	HPA001355	Atlas Antibodies	1:50
JUP	CAB002139	Novocastra	1:25
KRT17	HPA000452	Atlas Antibodies	1:200
LYN	HPA001231	Atlas Antibodies	1:250
MIXL1	HPA005662	Atlas Antibodies	1:100
MKI67	CAB000058	DakoCytomation	1:200
PDE6A	HPA016970	Atlas Antibodies	1:35
PECAM1	HPA004690	Atlas Antibodies	1:50
PTPRC	CAB000052	DakoCytomation	1:500
SATB2	CAB025742	Atlas Antibodies	1:200
VIL1	HPA006885	Atlas Antibodies	1:500
ZNF473	HPA004191	Atlas Antibodies	1:125
